# Supplementary material for: Assessment of the contribution of residential waste burning to ambient PM 10 concentrations in Hungary and Romania
Source: Copernicus journal article supplement (doi:10.5194/egusphere-2023-1786), 2023-08-16
Supplement: Supplementary file 1 [file egusphere-2023-1786-supplement.pdf]

## Supplementary material

### Assessment of the contribution of residential waste burning to ambient PM<sub>10</sub> concentrations in Hungary and Romania

András Hoffer<sup>1,2</sup>, Aida Meiramova<sup>2</sup>, Ádám Tóth<sup>2</sup>, Beatrix Jancsek-Turóczy<sup>1,2</sup>, Gyula Kiss<sup>3</sup>, Erika Andrea Levei<sup>4</sup>, Luminita Marmureanu<sup>5,6</sup>, Attila Machon<sup>7</sup>, András Gelencsér<sup>1,2</sup>

<sup>1</sup>ELKH-PE Air Chemistry Research Group, Veszprém, H-8200 Hungary

<sup>2</sup>Research Institute of Biomolecular and Chemical Engineering, University of Pannonia, Veszprém, H-8200, Hungary

<sup>3</sup>Renewable Energy Research Group, University of Pannonia Nagykanizsa - University Center for Circular Economy, Nagykanizsa, 8800, Hungary

<sup>4</sup>Research Institute for Analytical Instrumentation Subsidiary, INCDO-INOE 2000, Cluj-Napoca, RO-400293, Romania

<sup>5</sup>National Institute of Research and Development for Optoelectronics INOE2000, 409 Atomiștilor, RO-077125, Măgurele, Ilfov, Romania

<sup>6</sup>National Institute for Research and Development in Forestry “Marin Drăcea” - INCDS, Voluntari, RO-077030, Romania

<sup>7</sup>Air Quality Reference Centre, Hungarian Meteorological Service, Budapest, H-1181, Hungary

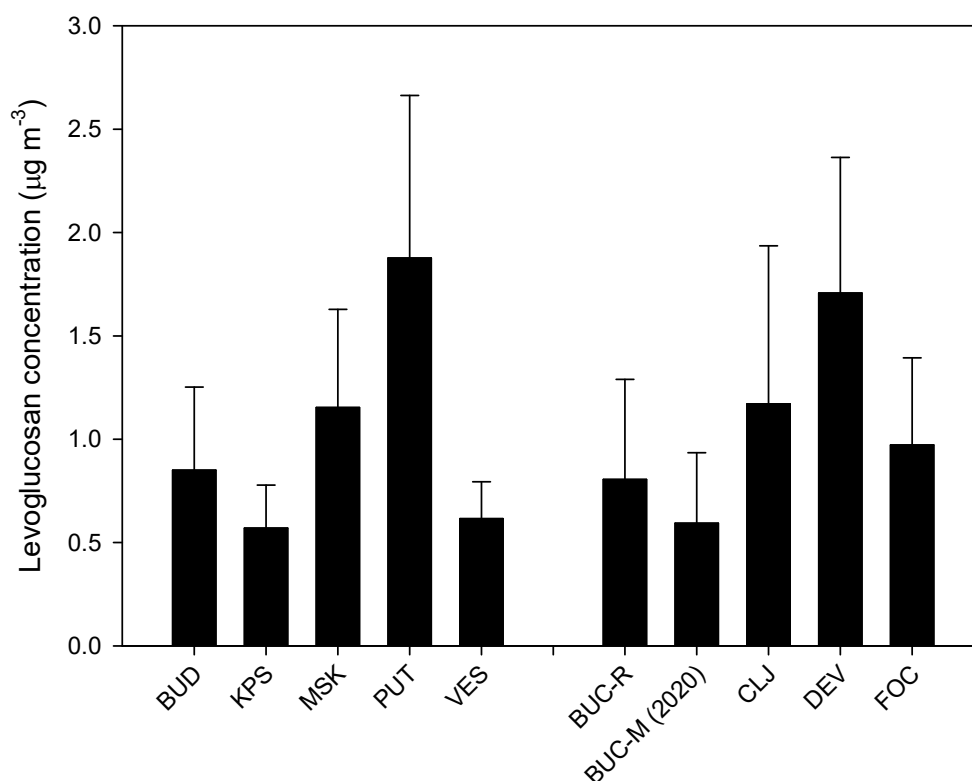

Figure S1 Average concentration of levoglucosan measured at the sampling locations in the heating seasons.

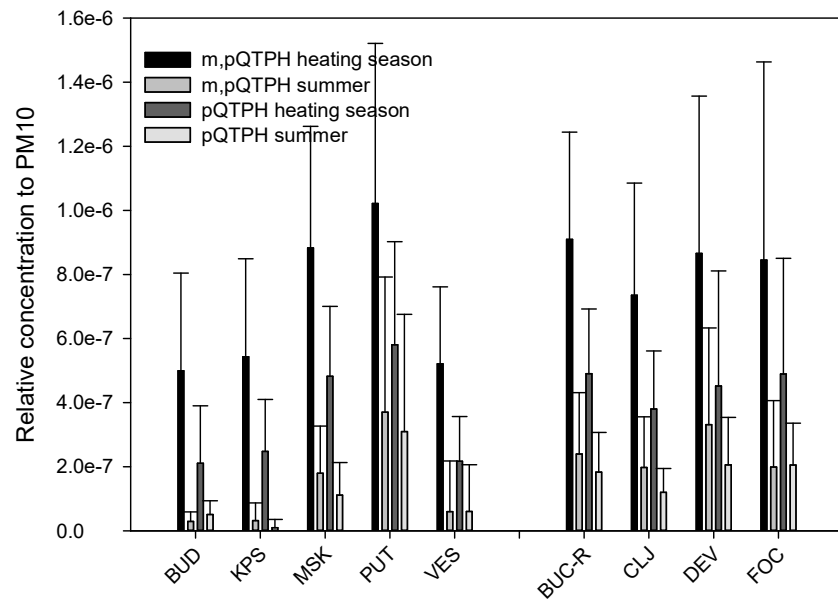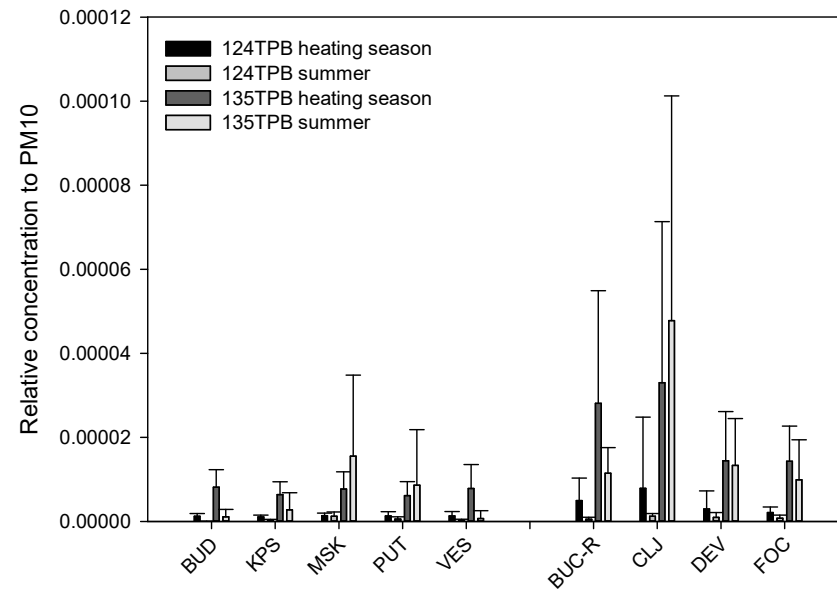

**Figure S2** The relative concentration (concentration ratio) of quaterphenyls (left side) and triphenylbenzenes (right side) to PM<sub>10</sub> in the samples collected in the heating season as well as in the summer samples.
